# Supplementary material for: Carpesabrolide A, a novel meroterpenoid with anti-inflammatory activity from Carpesium abrotanoides
Source: Royal Society of Chemistry journal article supplement (doi:10.1039/d4ra00292j), 2024-01-01
Supplement: d4ra00292j1.pdf [file d4ra00292j1.pdf]

*Supporting information for*

## **Carpesabrolide A, a novel meroterpenoid with anti-inflammatory activity from *Carpesium abrotanoides***

**Xiao-Fang Zhang, Jiao-Xian Du, Si-Qiong Teng, Hui Liu, Juan He,\* Tao Feng\* and Ji-Kai Liu\***

College of Life Science, and School of Pharmaceutical Sciences, South-Central Minzu University, Wuhan 430074, China

\*Corresponding authors: liujikai@mail.scuec.edu.cn (J. K. Liu), tfeng@mail.scuec.edu.cn (T. Feng),  
2015048@mail.scuec.edu.cn

### **Content**

|                                                                                                                                                                  |     |
|------------------------------------------------------------------------------------------------------------------------------------------------------------------|-----|
| <b>S1. NMR spectra and MS for carpesabrolide A (1)</b> .....                                                                                                     | S2  |
| <b>S2. NMR spectra for 4<math>\beta</math>,10<math>\alpha</math>-dihydroxy-5<math>\alpha</math>(H)-1,11(13)-guaidien-8<math>\alpha</math>,12-olide (2)</b> ..... | S9  |
| <b>S3. X-ray crystal data for carpesabrolide A (1)</b> .....                                                                                                     | S11 |

# S1. NMR spectra and MS for carpesabrolide A (1)

<sup>1</sup>H NMR of 1 in methanol-*d*<sub>4</sub>

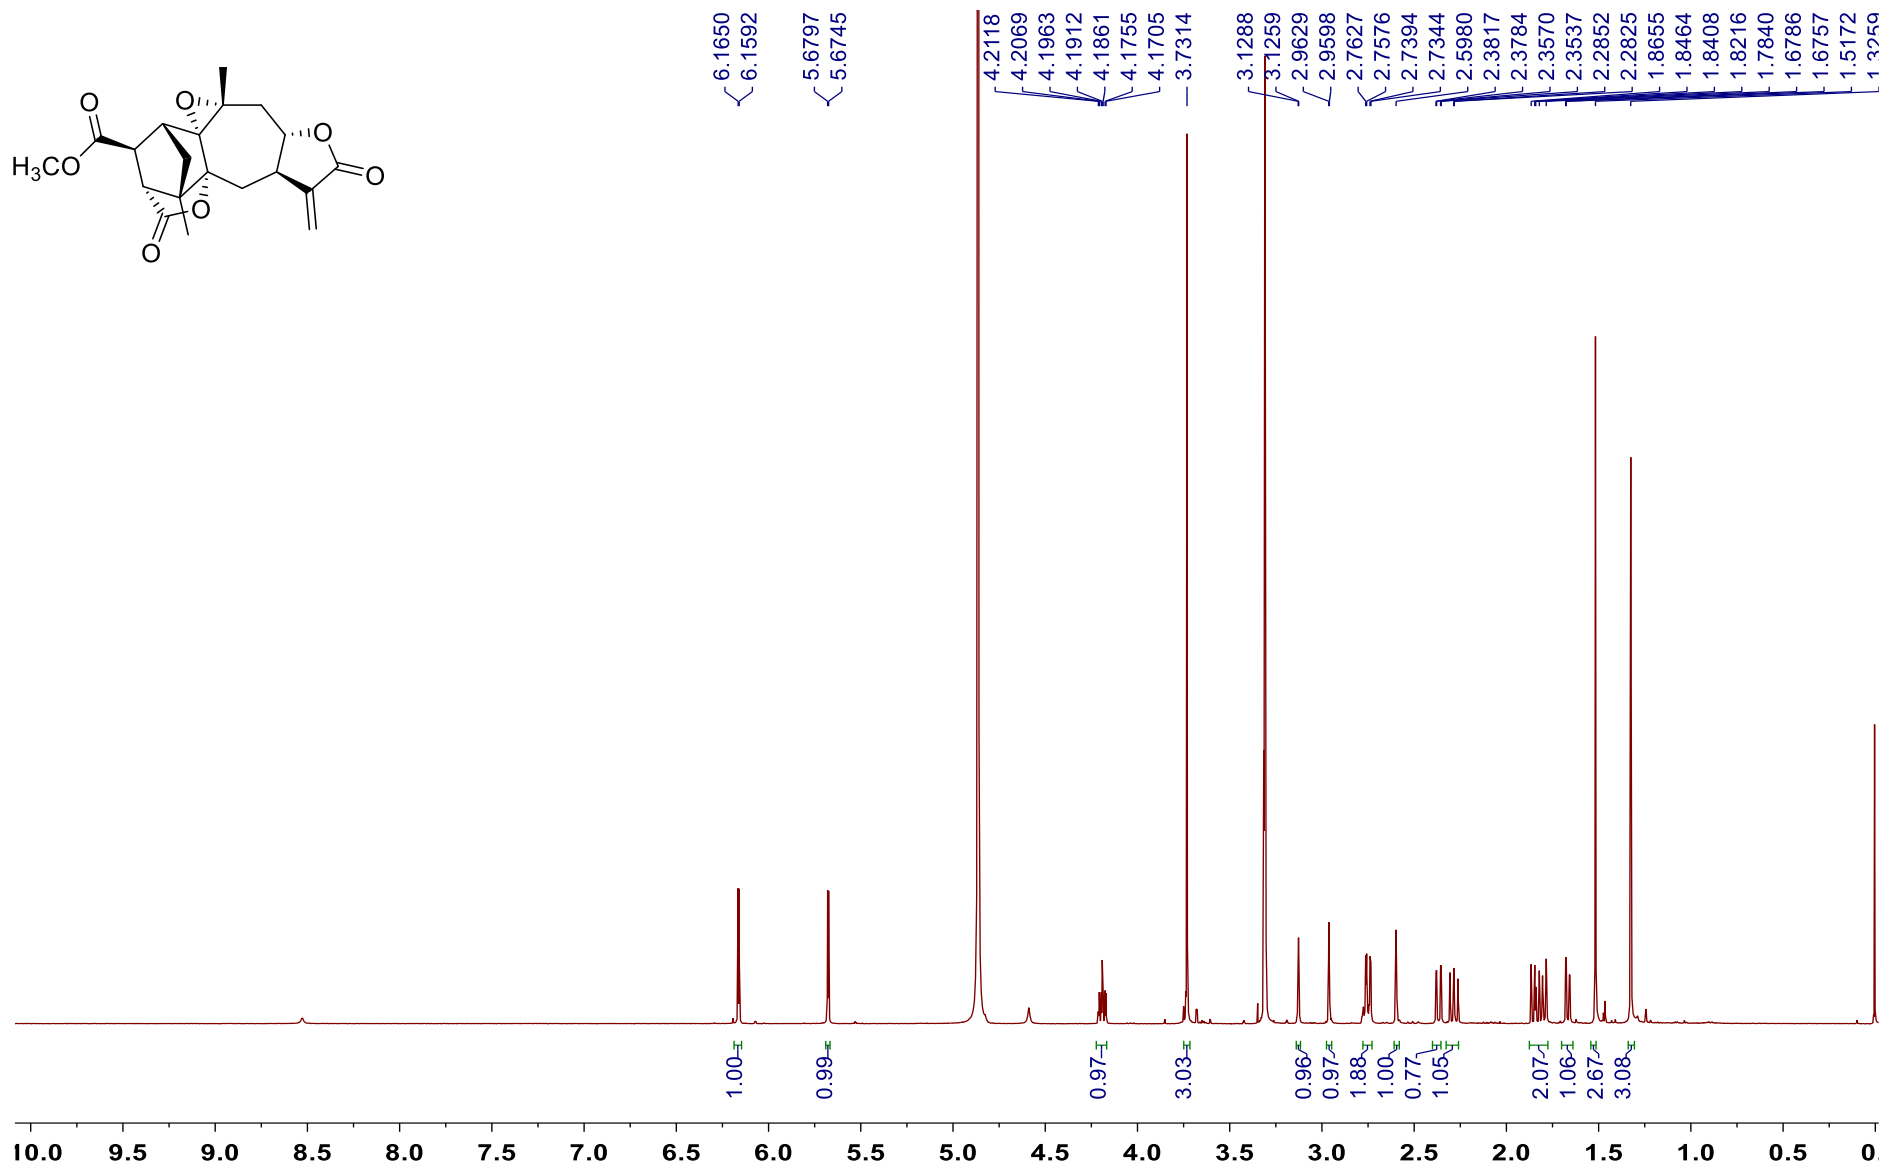

$^{13}\text{C}$  NMR and DEPT of **1** in methanol- $d_4$

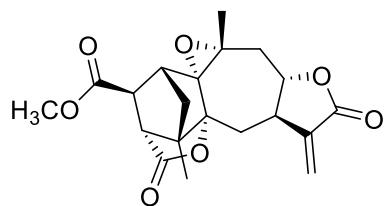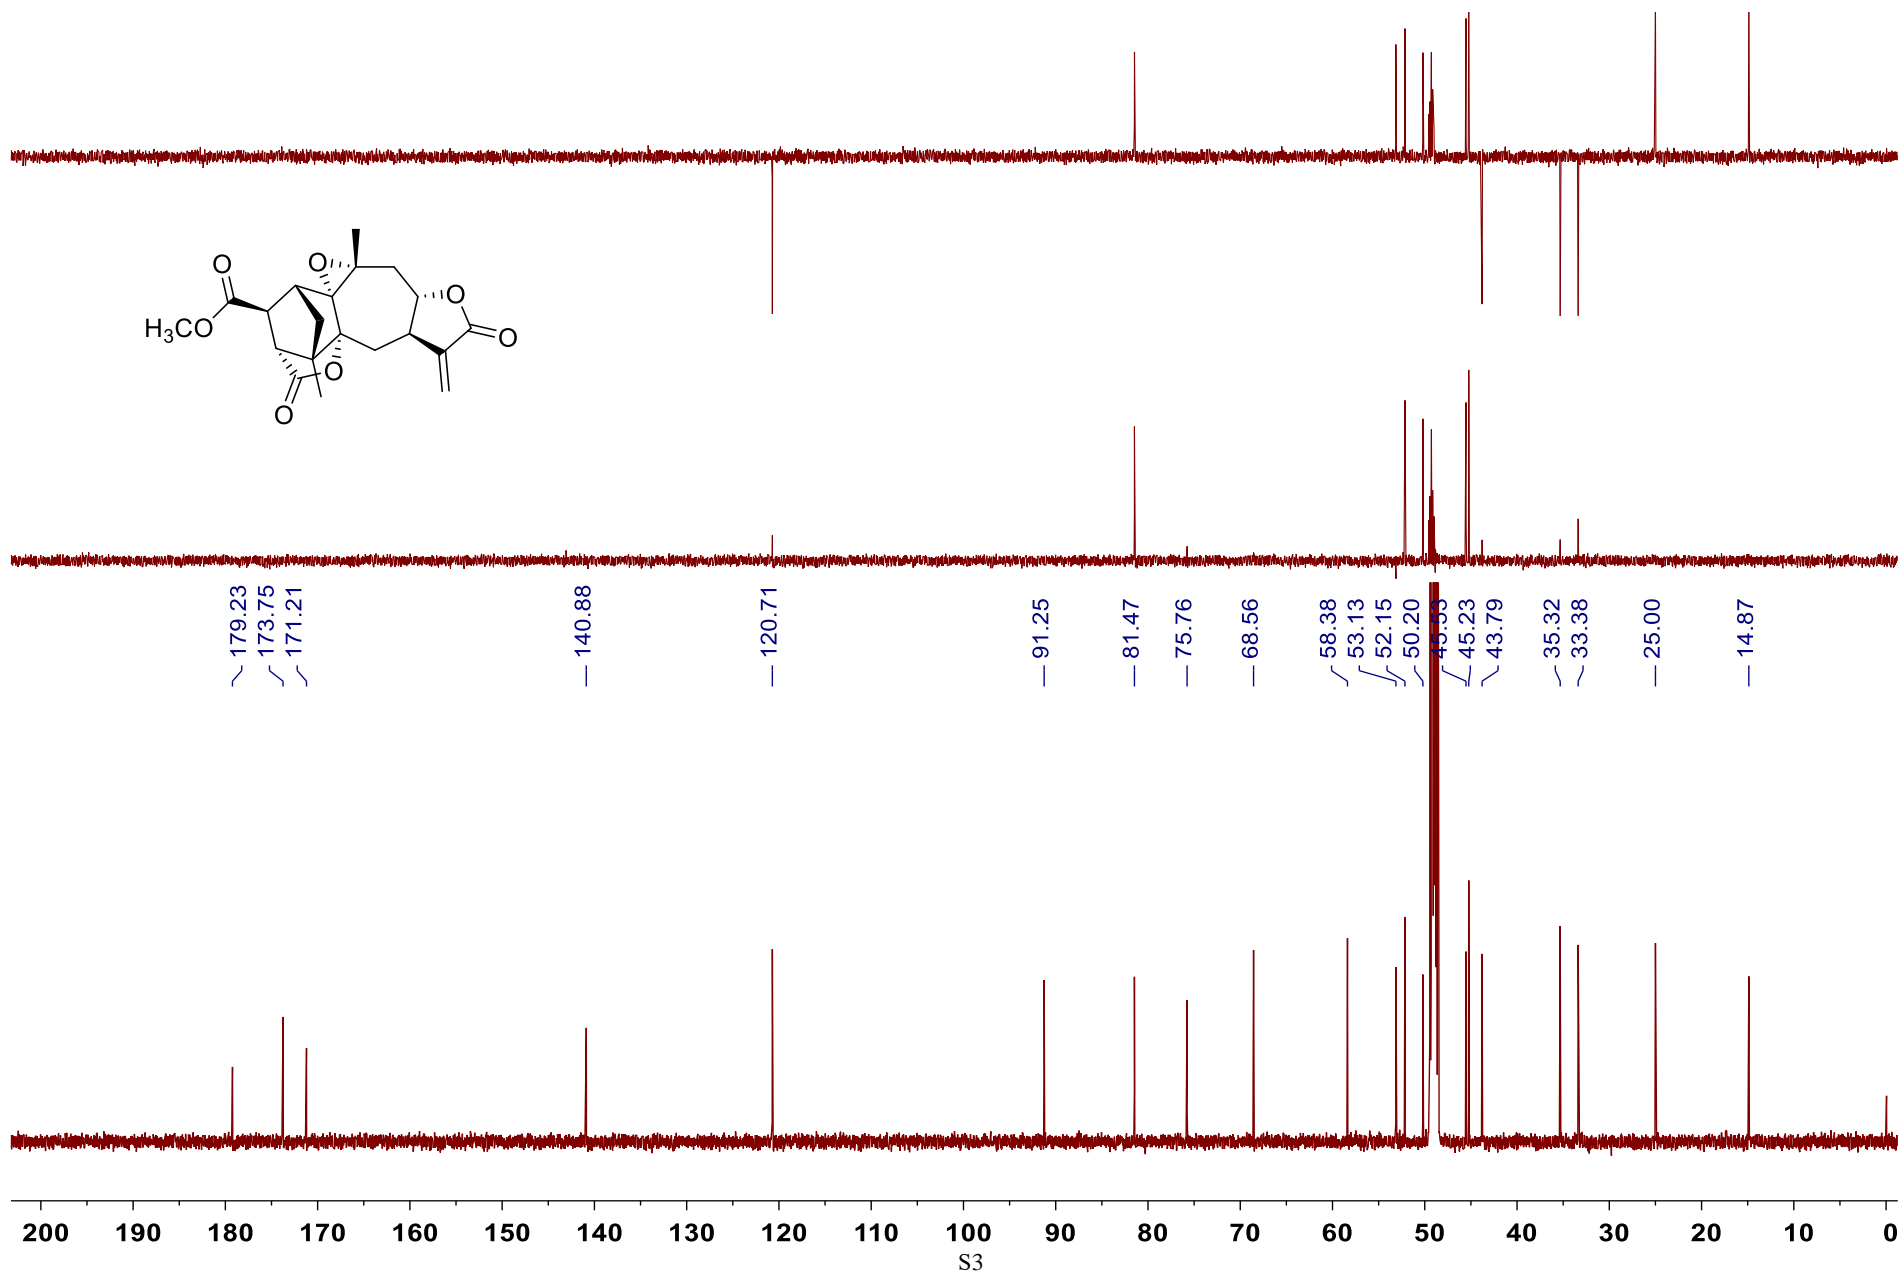

HSQC of **1** in methanol-*d*<sub>4</sub>

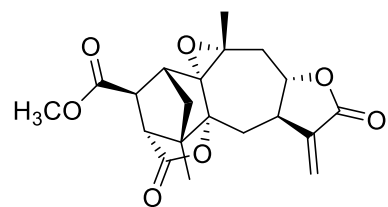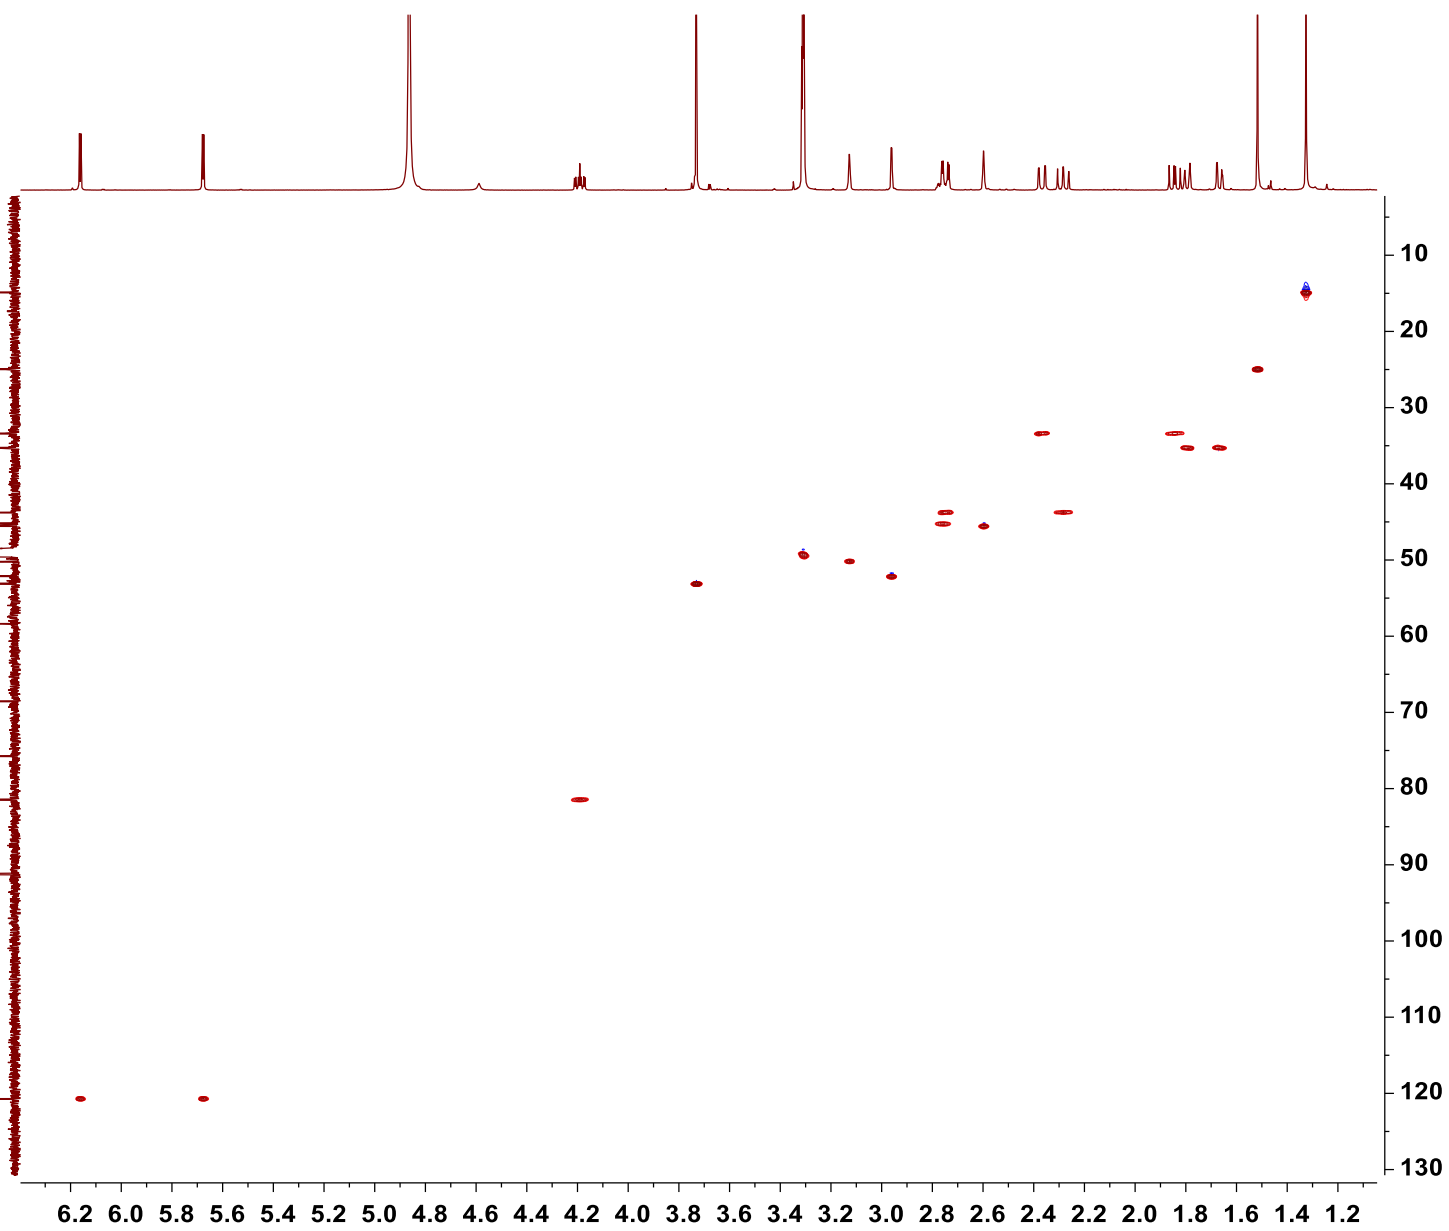

HMBC of **1** in methanol-*d*<sub>4</sub>

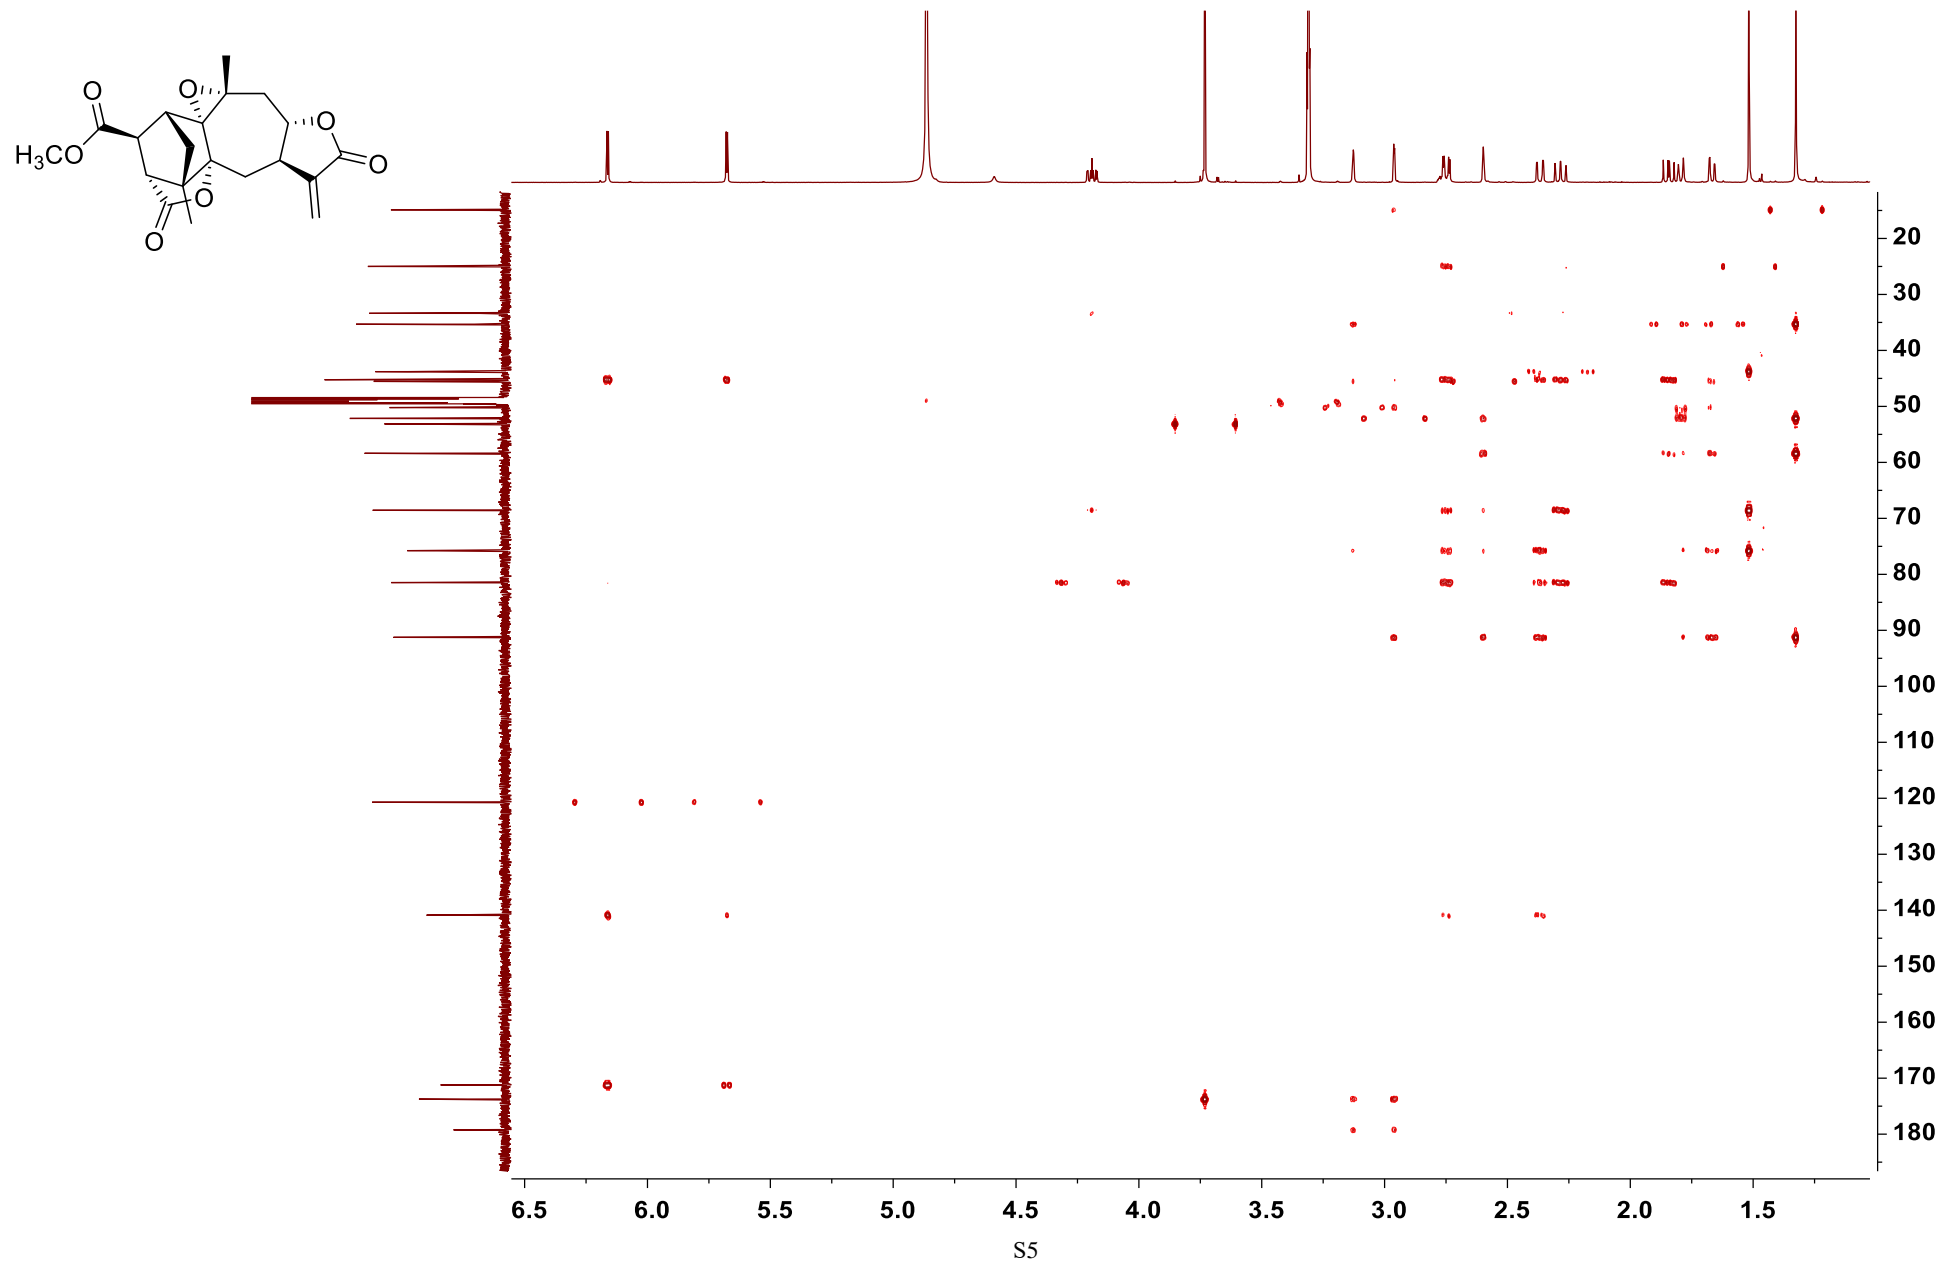

$^1\text{H}$ - $^1\text{H}$  COSY of **1** in methanol- $d_4$

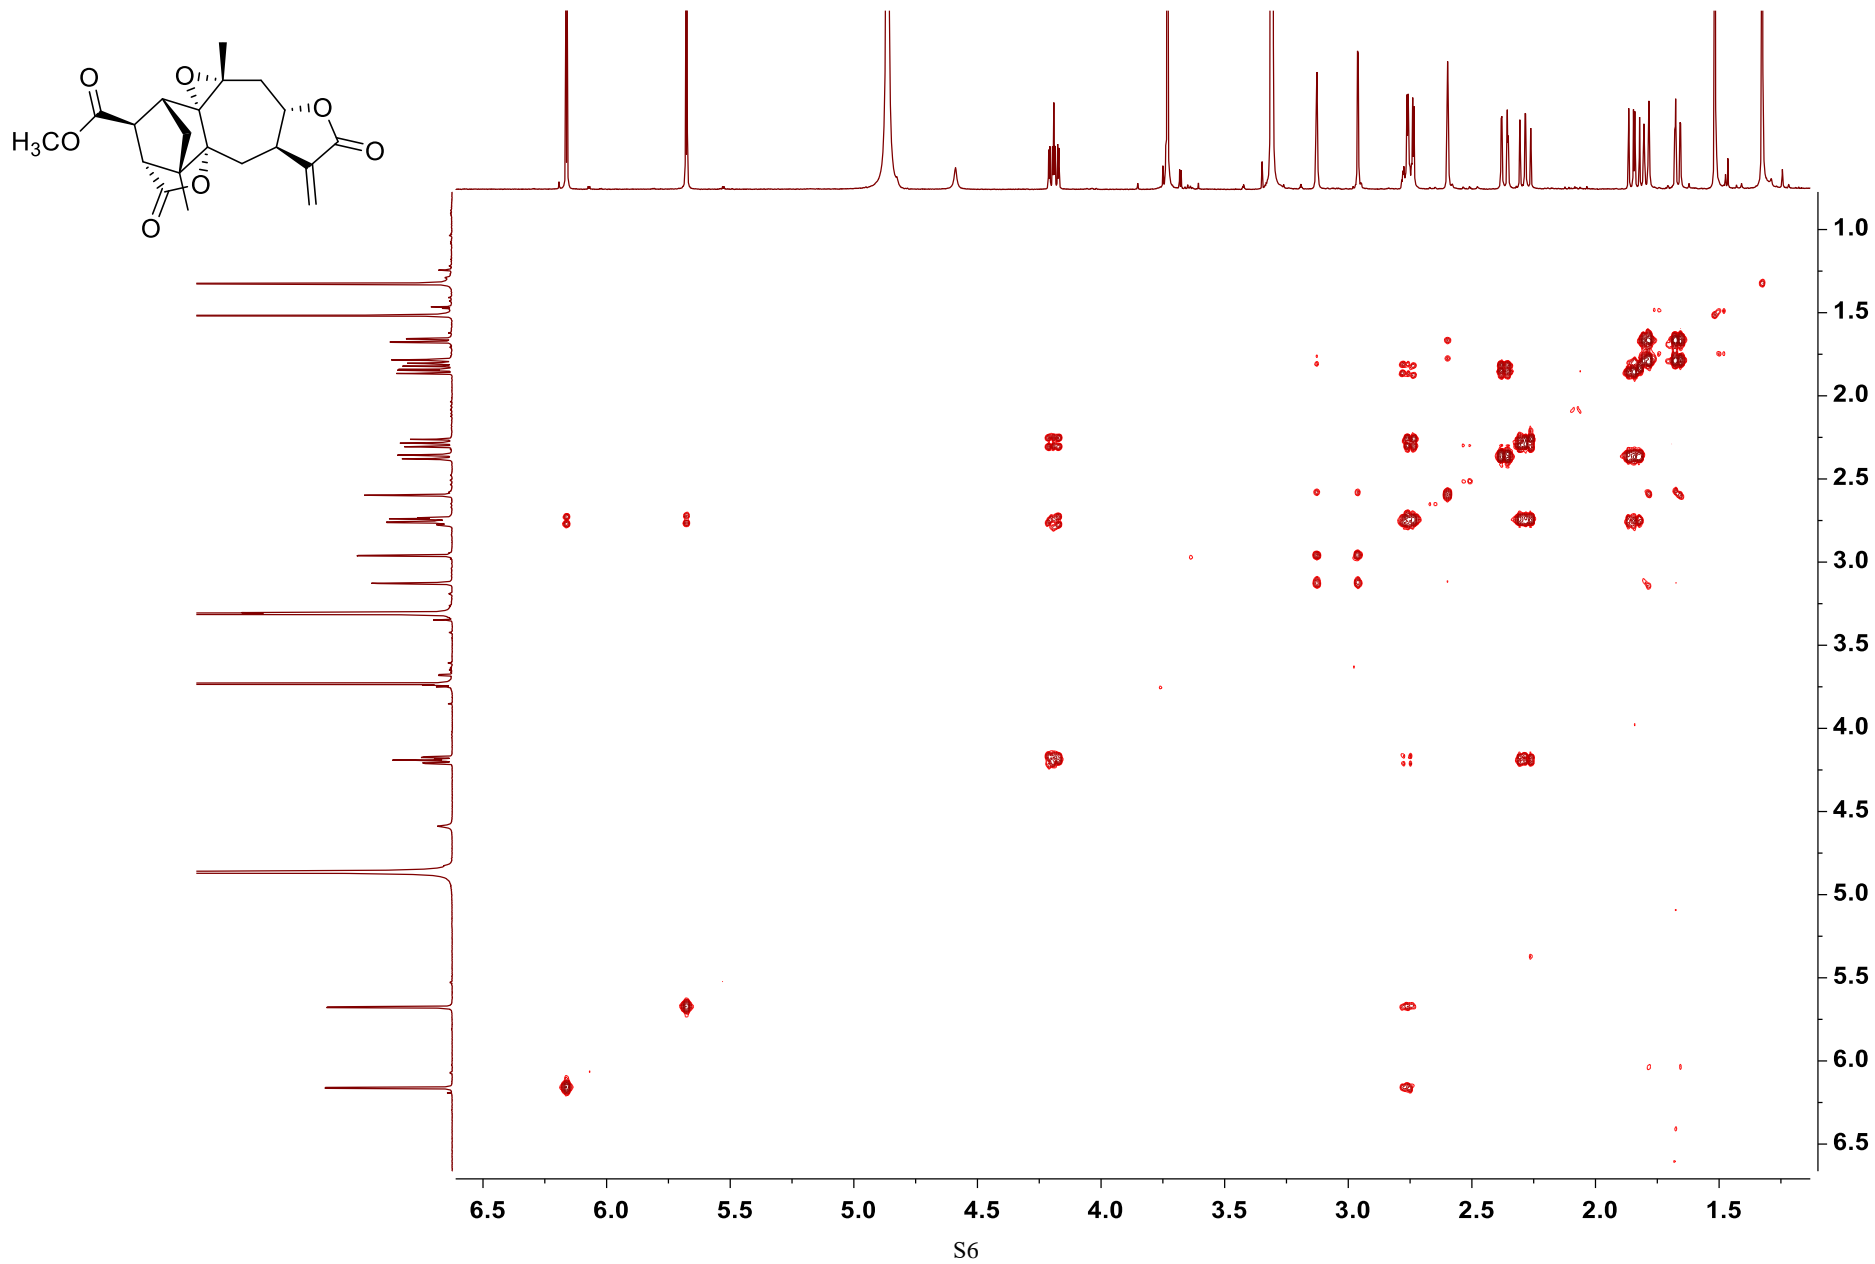

ROSEY of **1** in methanol-*d*<sub>4</sub>

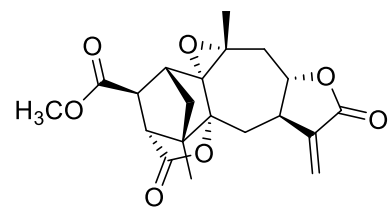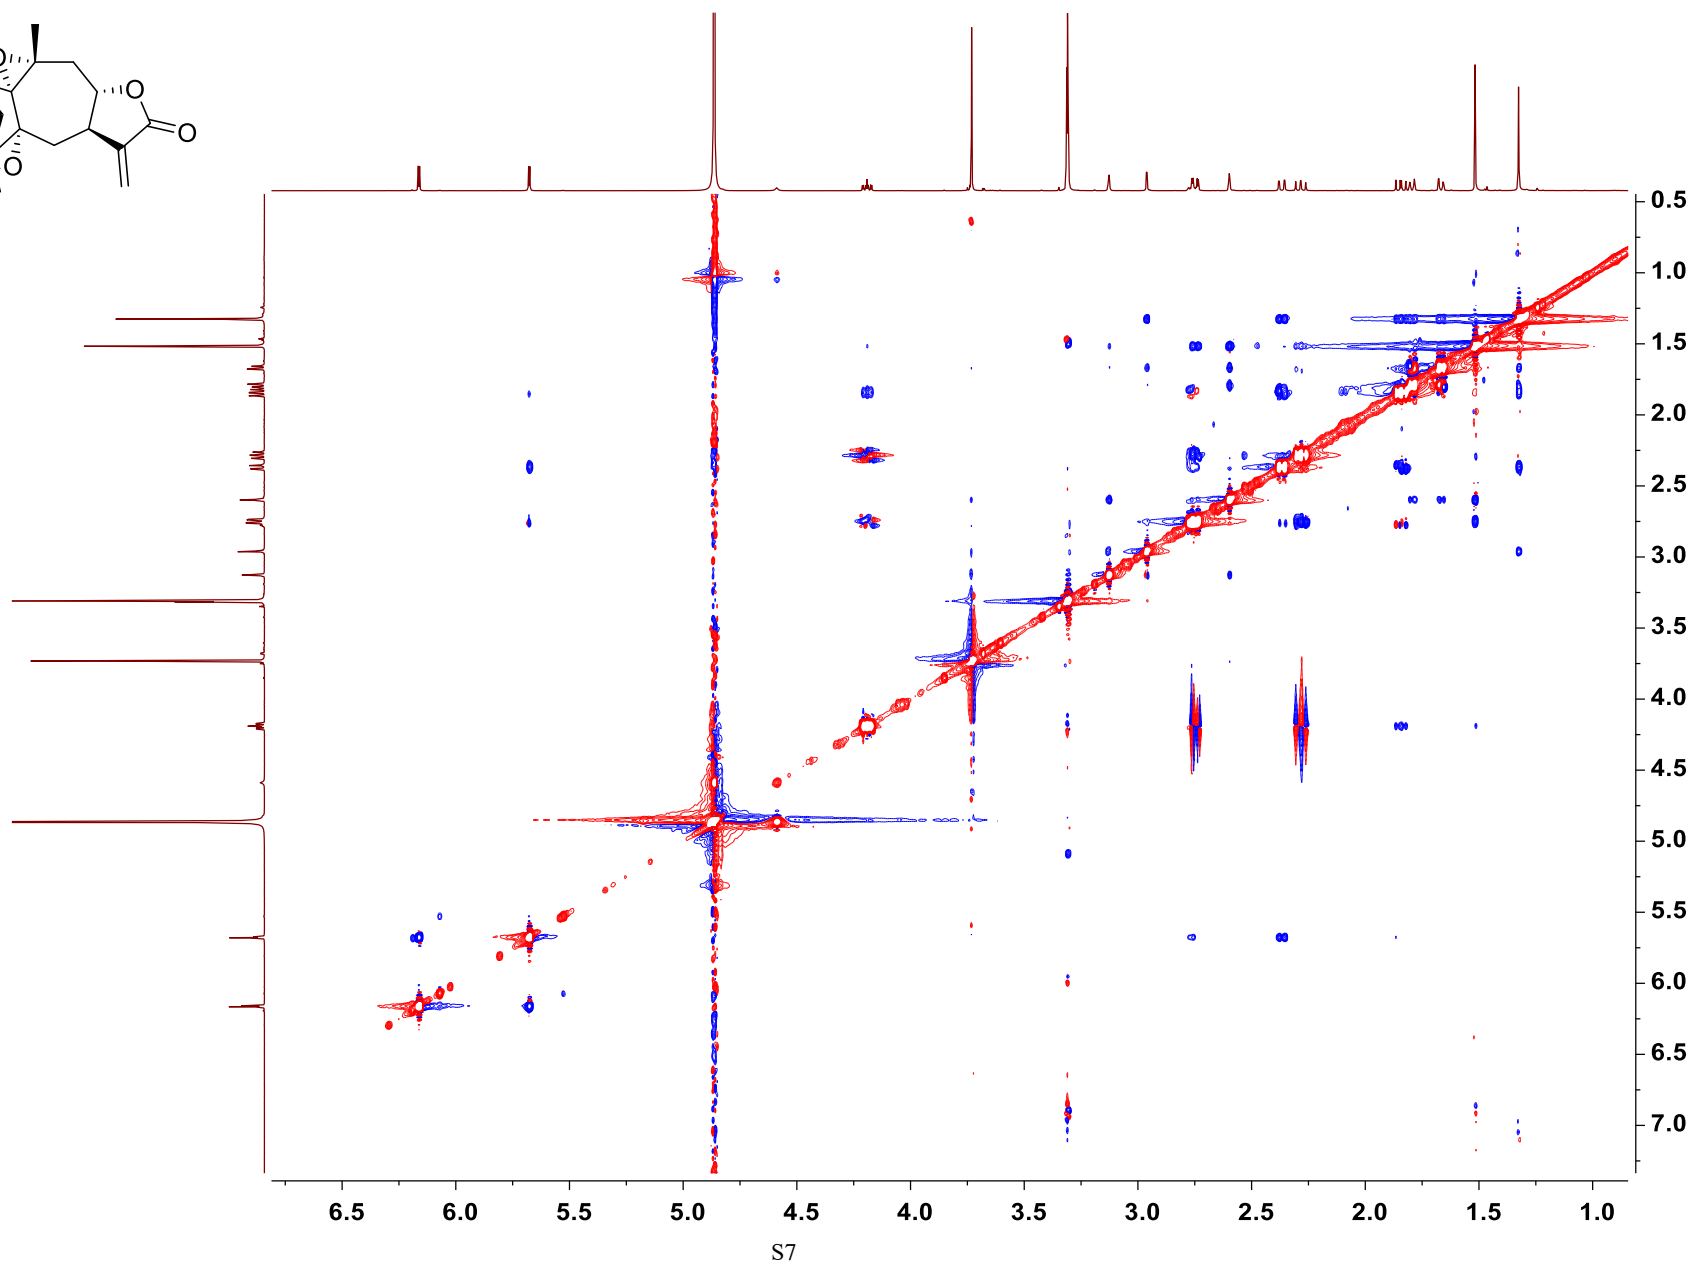

# HR-ESIMS of 1

T: FTMS + p ESI Full lock ms [150.0000-1100.0000]

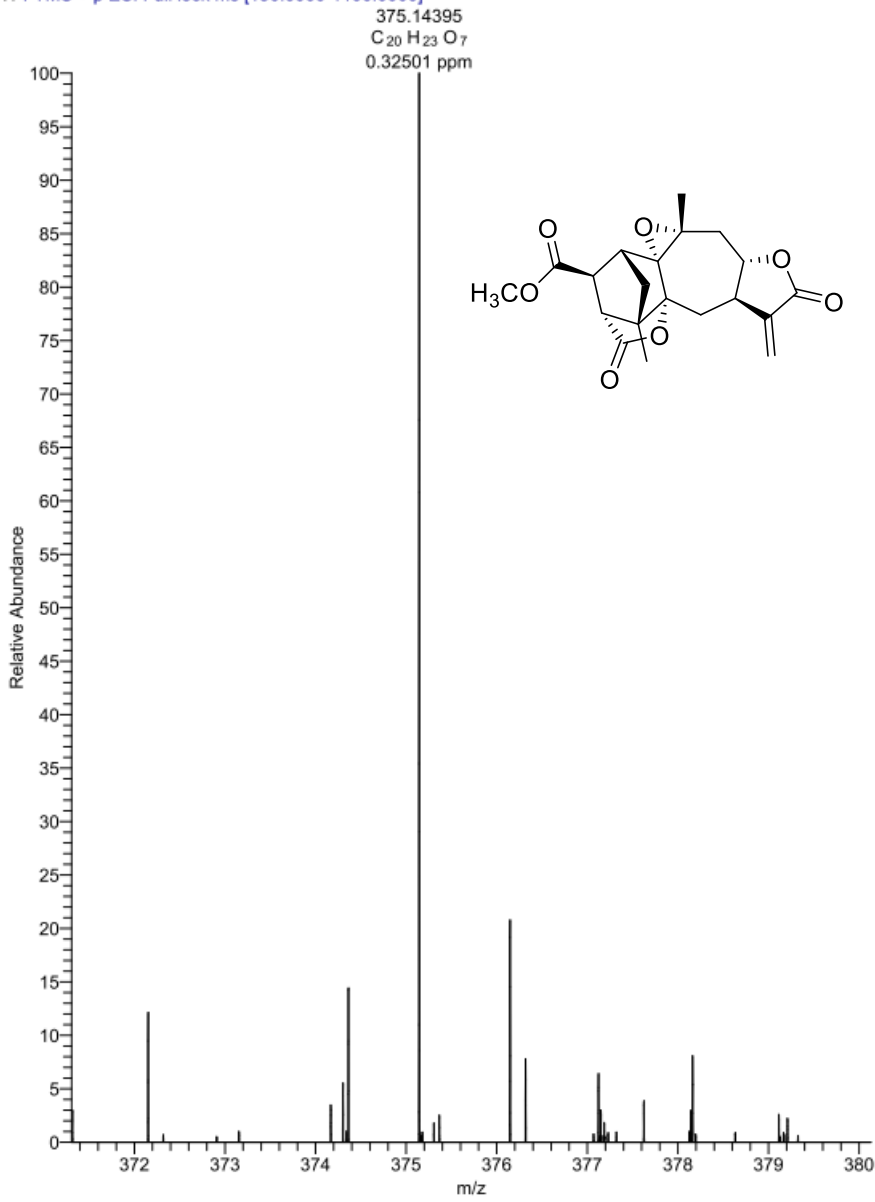



# S1. NMR spectra for 4 $\beta$ ,10 $\alpha$ -dihydroxy-5 $\alpha$ (H)-1,11(13)-guaïdien-8 $\alpha$ ,12-olide (2)

$^1\text{H}$  NMR (500 MHz) of 2 in methanol- $d_4$

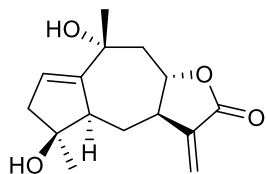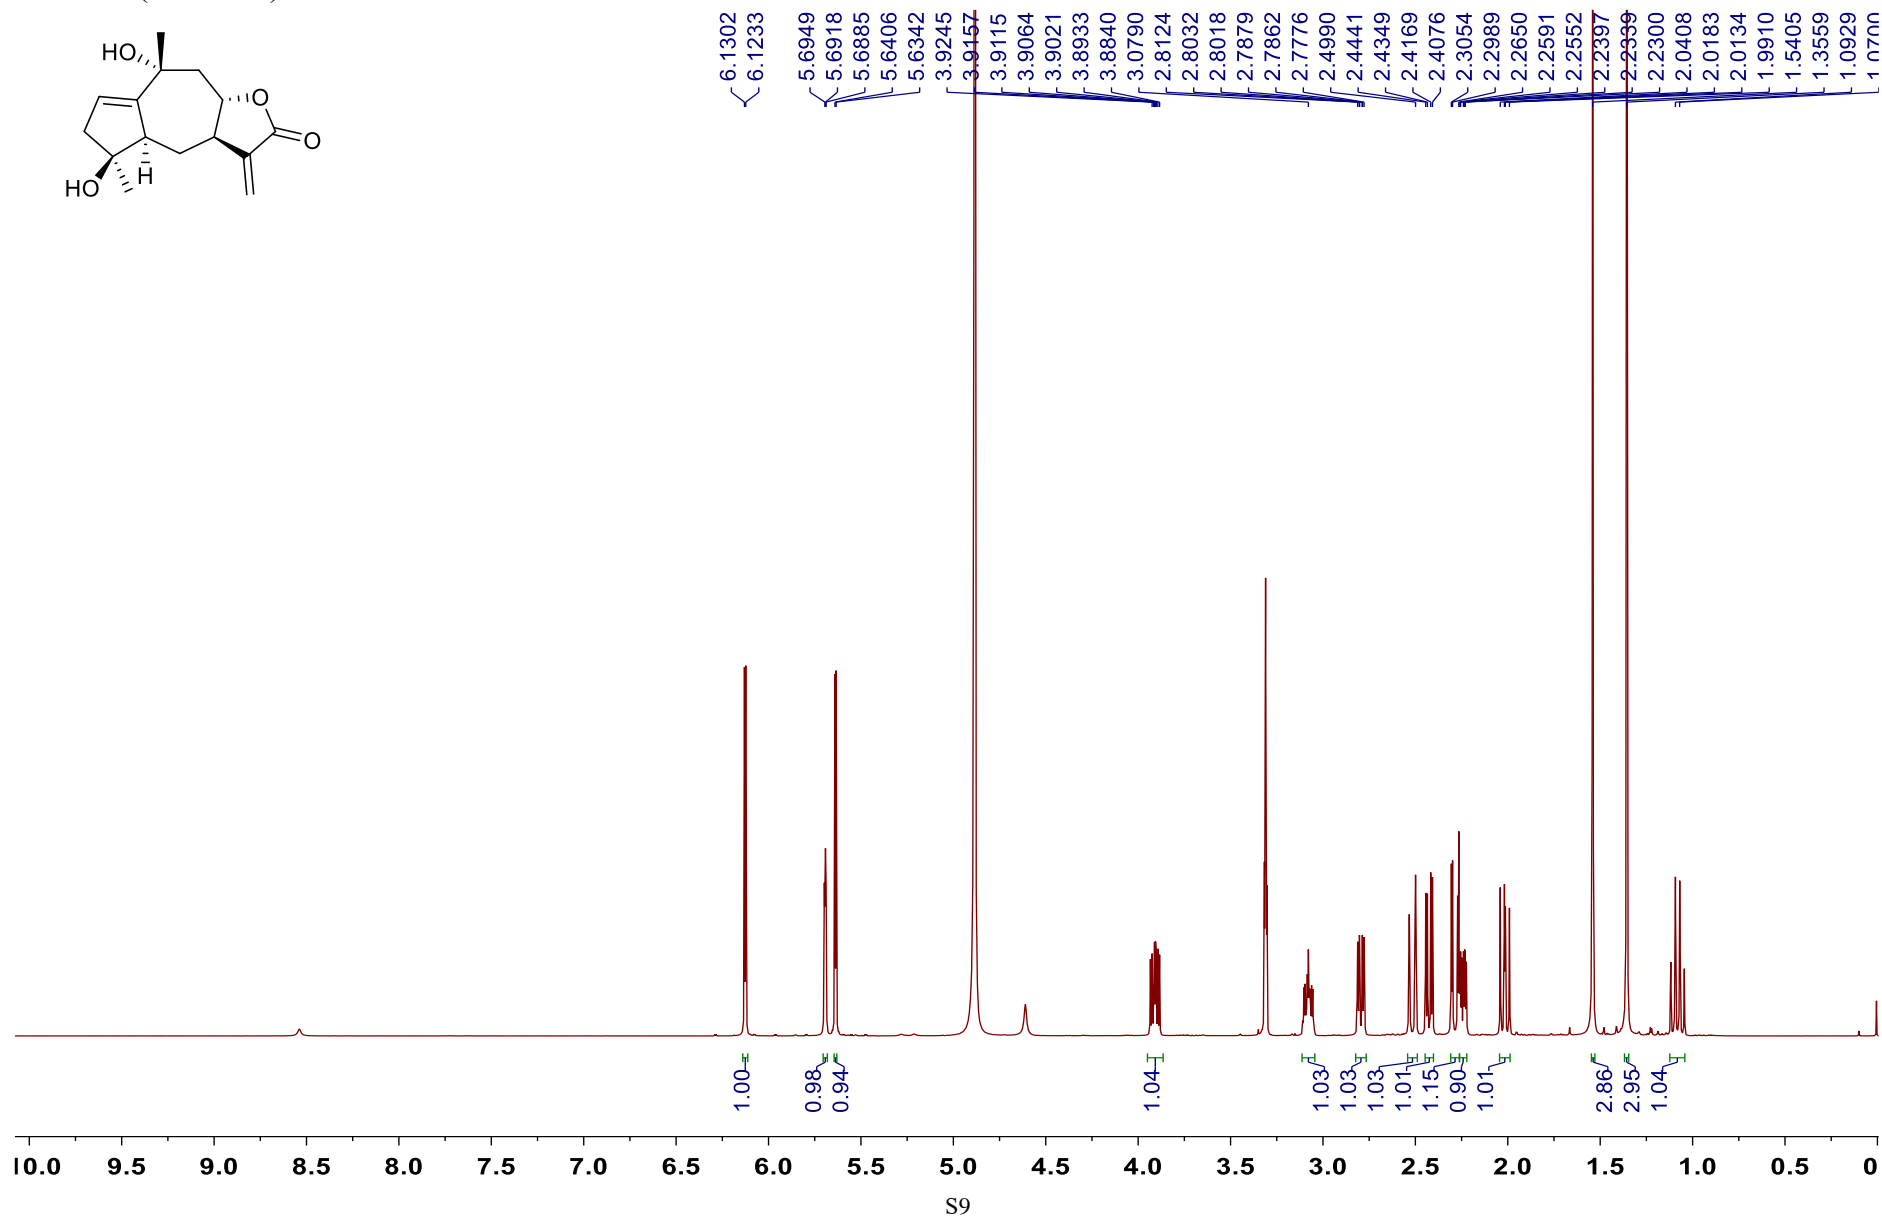

$^{13}\text{C}$  NMR and DEPT (125 MHz) of **2** in methanol- $d_4$

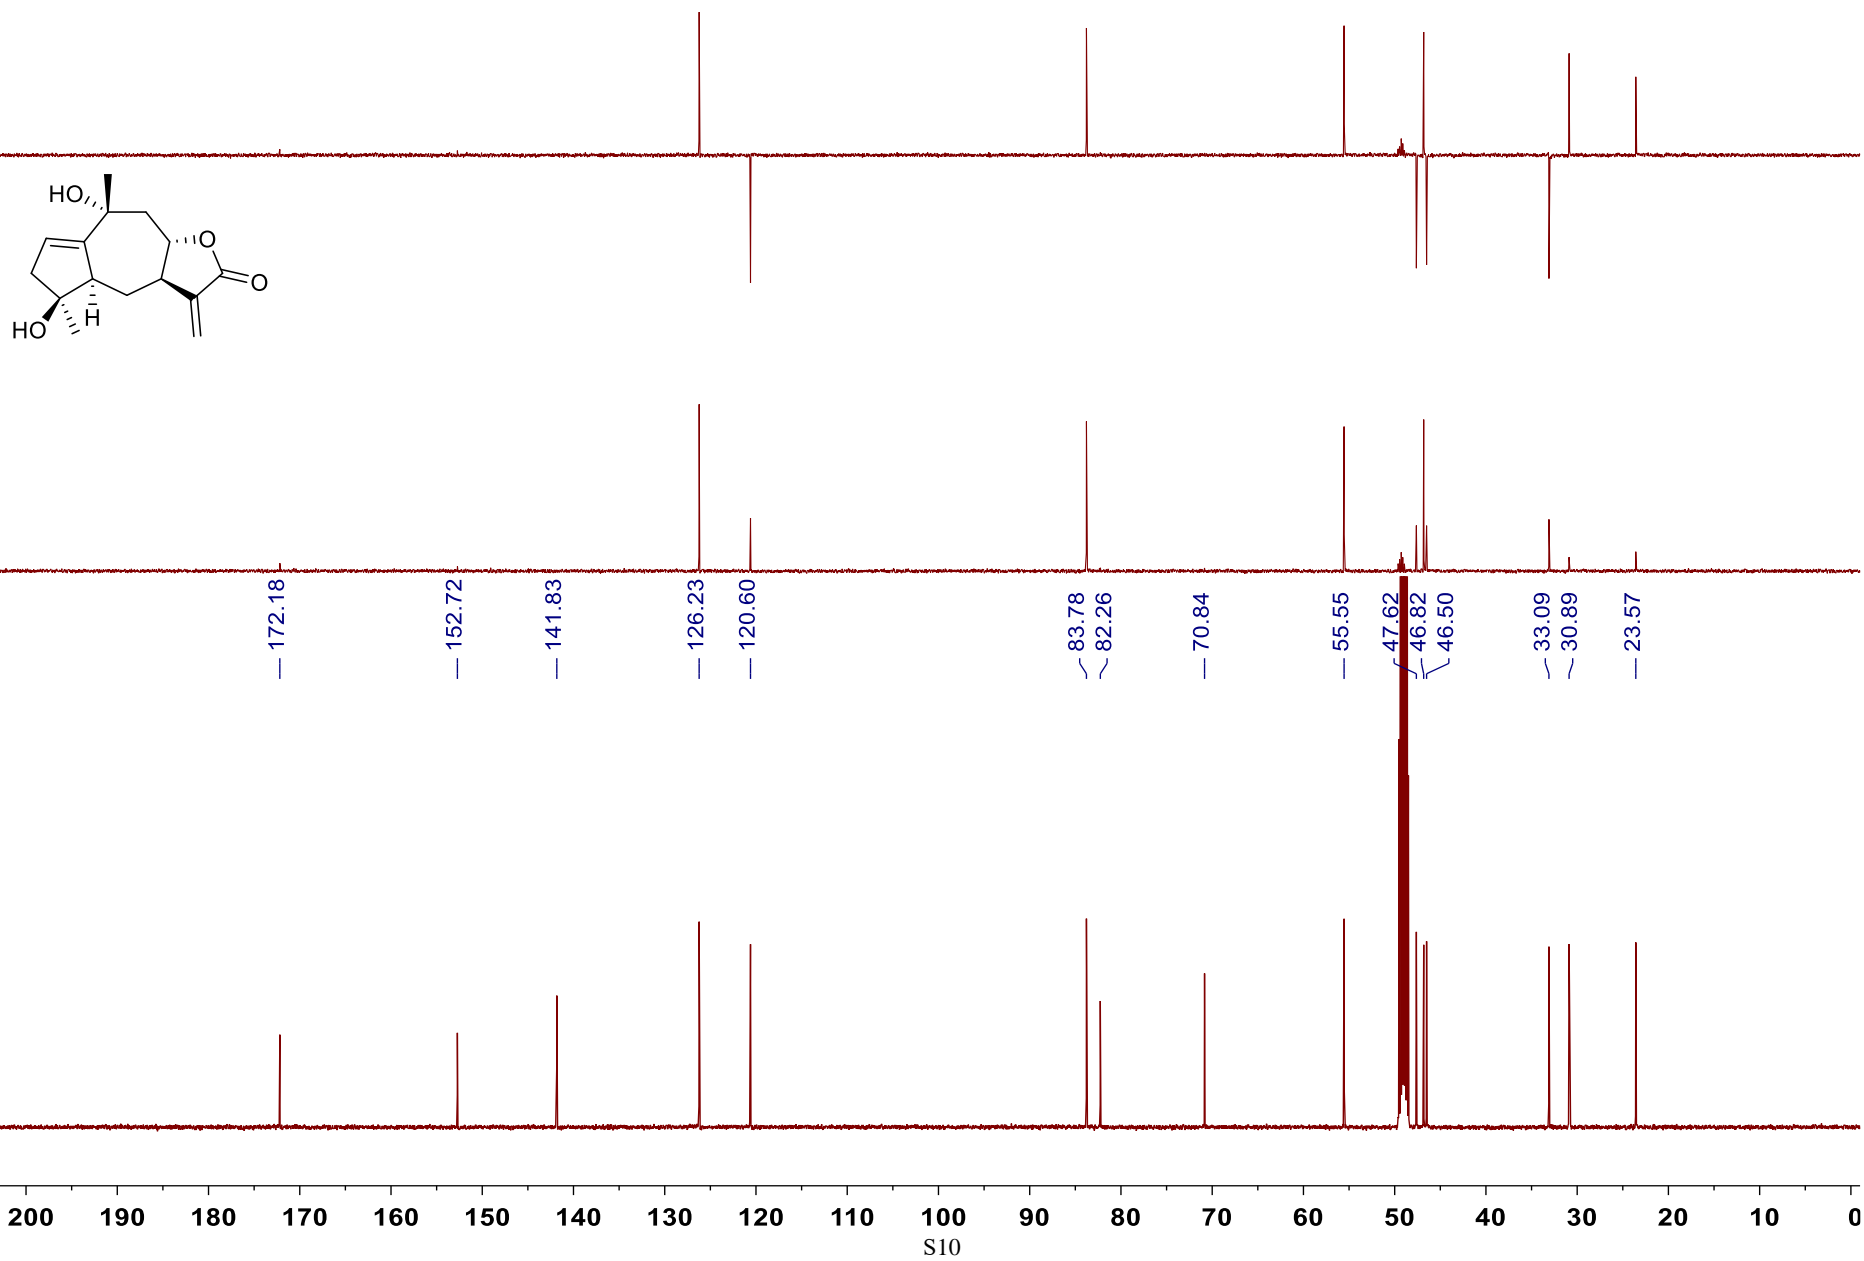

## S2. X-ray crystal data for carpesabrolide A (1)

$C_{20}H_{22}O_7$ ,  $M = 374.37$ ,  $a = 9.8989(3) \text{ \AA}$ ,  $b = 11.3680(3) \text{ \AA}$ ,  $c = 15.8912(5) \text{ \AA}$ ,  $\alpha = 90^\circ$ ,  $\beta = 90^\circ$ ,  $\gamma = 90^\circ$ ,  $V = 1788.25(9) \text{ \AA}^3$ ,  $T = 150.(2) \text{ K}$ , space group  $P212121$ ,  $Z = 4$ ,  $\mu(\text{Cu K}\alpha) = 0.881 \text{ mm}^{-1}$ , 16042 reflections measured, 3367 independent reflections ( $R_{int} = 0.0552$ ). The final  $R_I$  values were 0.0295 ( $I > 2\sigma(I)$ ). The final  $wR(F^2)$  values were 0.0723 ( $I > 2\sigma(I)$ ). The final  $R_I$  values were 0.0310 (all data). The final  $wR(F^2)$  values were 0.0731 (all data). The goodness of fit on  $F^2$  was 1.057. Flack parameter = 0.08(7).

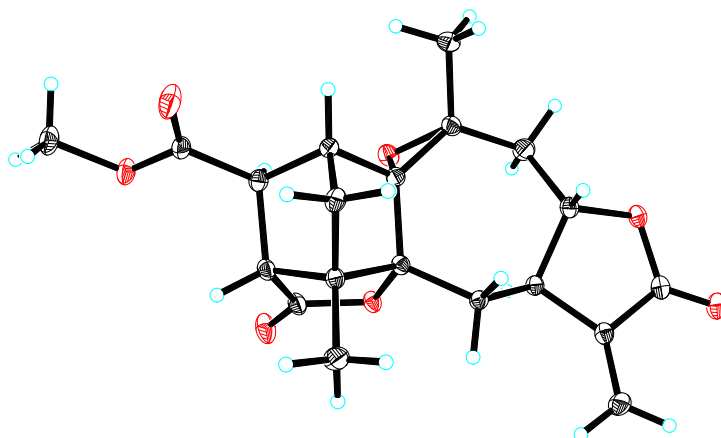

View of a molecule of **1** (displacement ellipsoids are drawn at the 30% probability level)

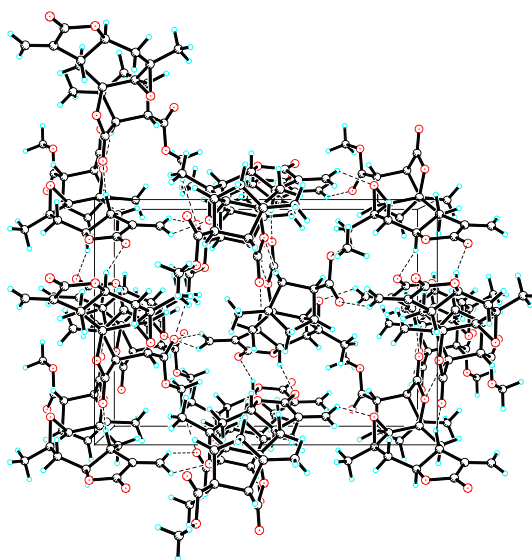

View of the pack drawing of **1** (hydrogen-bonds are shown as dashed lines).

Crystal data and structure refinement for **1**.

|                                   |                                                                                                   |
|-----------------------------------|---------------------------------------------------------------------------------------------------|
| Identification code               | global                                                                                            |
| Empirical formula                 | C <sub>20</sub> H <sub>22</sub> O <sub>7</sub>                                                    |
| Formula weight                    | 374.37                                                                                            |
| Temperature                       | 150(2) K                                                                                          |
| Wavelength                        | 1.54178 Å                                                                                         |
| Crystal system                    | Orthorhombic                                                                                      |
| Space group                       | P2 <sub>1</sub> 2 <sub>1</sub> 2 <sub>1</sub>                                                     |
| Unit cell dimensions              | a = 9.8989(3) Å      α = 90°.<br>b = 11.3680(3) Å      β = 90°.<br>c = 15.8912(5) Å      γ = 90°. |
| Volume                            | 1788.25(9) Å <sup>3</sup>                                                                         |
| Z                                 | 4                                                                                                 |
| Density (calculated)              | 1.391 Mg/m <sup>3</sup>                                                                           |
| Absorption coefficient            | 0.881 mm <sup>-1</sup>                                                                            |
| F(000)                            | 792                                                                                               |
| Crystal size                      | 0.360 x 0.200 x 0.140 mm <sup>3</sup>                                                             |
| Theta range for data collection   | 4.78 to 70.04°.                                                                                   |
| Index ranges                      | -12 ≤ h ≤ 12, -13 ≤ k ≤ 12, -19 ≤ l ≤ 19                                                          |
| Reflections collected             | 16042                                                                                             |
| Independent reflections           | 3367 [R(int) = 0.0552]                                                                            |
| Completeness to theta = 70.04°    | 99.5 %                                                                                            |
| Absorption correction             | Semi-empirical from equivalents                                                                   |
| Max. and min. transmission        | 0.89 and 0.72                                                                                     |
| Refinement method                 | Full-matrix least-squares on F <sup>2</sup>                                                       |
| Data / restraints / parameters    | 3367 / 0 / 247                                                                                    |
| Goodness-of-fit on F <sup>2</sup> | 1.057                                                                                             |
| Final R indices [I > 2σ(I)]       | R1 = 0.0295, wR2 = 0.0723                                                                         |
| R indices (all data)              | R1 = 0.0310, wR2 = 0.0731                                                                         |
| Absolute structure parameter      | 0.08(7)                                                                                           |
| Largest diff. peak and hole       | 0.183 and -0.184 e.Å <sup>-3</sup>                                                                |
